# Supplementary material for: Identification of simvastatin-regulated targets associated with JNK activation in DU145 human prostate cancer cell death signaling
Source: PubMed Central journal article supplement — BMB Rep. 2017 Sep 30;50(9):466–71. doi: 10.5483/BMBRep.2017.50.9.087 (PMC5625694; doi:10.5483/bmbrep.2017.50.9.087), 2017-09-30
Supplement: bmb-50-466_suppl.pdf [file bmb-50-466_suppl.pdf]

**Manuscript Type:** Article

**Title:** Identification of simvastatin-regulated targets associated with JNK activation in DU145 human prostate cancer cell death signaling

**Author's name:** Eun Joo Jung <sup>1,3</sup>, Ky Hyun Chung <sup>2,3</sup>, and Choong Won Kim <sup>1,3, \*</sup>.

**Affiliation:** <sup>1</sup>Department of Biochemistry, Gyeongsang National University School of Medicine, 15 Jinju-daero 816beon-gil, Jinju 52727, Republic of Korea

<sup>2</sup>Department of Urology, Gyeongsang National University Hospital, 79 Gangnam-ro, Jinju 52727, Republic of Korea

<sup>3</sup>Institute of Health Sciences, Gyeongsang National University, 15 Jinju-daero 816beon-gil, Jinju 52727, Republic of Korea

**Running Title:** Simvastatin-regulated targets in DU145 cell death

**Keywords:** Simvastatin-regulated targets, docetaxel, JNK, proteomic analysis, DU145 cell death

**Corresponding Author's Information:** Choong Won Kim,

Department of Biochemistry, Gyeongsang National University School of Medicine, 15 Jinju-daero 816beon-gil, Jinju 52727, Republic of Korea

Tel: 82-55-772-8051, Fax: 82-55-772-8059, E-mail: cwkim@gnu.ac.kr

## SUPPLEMENTARY METATERIALS AND METHODS

### Materials

DU145 human prostate cancer cell line (HTB-81<sup>TM</sup>), fetal bovine serum (FBS) and eagle's minimum essential medium (EMEM) were purchased from the American Type Culture Collection (ATCC, Manassas, VA, USA). Penicillin/streptomycin was from Life Technologies (Carlsbad, CA, USA). Simvastatin, docetaxel, 0.4% trypan blue solution and Coomassie Brilliant Blue (CBB) G were from Sigma-Aldrich (St Louis, MO, USA). SP600125 was from Calbiochem (Billerica, MA, USA). Cell counting kit-8 (CCK-8) was from Dojindo (Kumamoto, Japan). DMSO, acrylamide/bis-acrylamide 37.5:1 solution (40%), urea, Tween-20 and ammonium sulfate were from Amresco (Solon, OH, USA). IPG strip (pH 4-7) 17 cm was from Bio-Rad (Quarry Bay, Hong Kong). Recombinant DNase I (RNase-free) was from Takara (Shiga, Japan). Sequencing-grade modified trypsin was from Promega (Madison, WI, USA). SuperSignal West Pico stable peroxide solution was from Pierce (Rockford, IL, USA). The following antibodies were used in this study: phospho-S473-Akt (Cell signaling, Danvers, MA, USA), phospho-Y204-ERK1/2 (Bioworld Technology, Louis Park, MN, USA), ERK1 (Transduction Laboratories, San Jose, CA, USA), phospho-T183/Y185-JNK1/2/3 (Bioworld Technology), JNK1 (D-6, Santa Cruz, Dallas, TX, USA), phospho-S63-c-Jun II (Cell signaling), PKC $\zeta$  (C-20, Santa Cruz), IKK $\alpha$  (M-110, Santa Cruz),  $\beta$ -actin (Sigma-Aldrich), hnRNP K (D-6, Santa Cruz), TXNDC5 (2E7/7, Abcam, Cambridge, MA, USA), cHMGCS (H-9, Santa Cruz), NDRG1 (A-5, Santa Cruz), RAB1B (G-20, Santa Cruz), IDI1 (H-66, Santa Cruz), goat anti-rabbit horse-radish peroxidase conjugate (Bio-Rad, Hercules, CA, USA) and goat anti-mouse horse-radish peroxidase conjugate (Thermo Scientific, Rockford, IL, USA).

### **Cell culture**

DU145 cells were maintained in medium A (10% FBS, 1% penicillin/streptomycin, EMEM) in a humidified 5% CO<sub>2</sub> incubator at 37°C.

### **Cell viability analysis**

DU145 cells were split in a 24-well dish (3 X 10<sup>4</sup> cells) and treated as indicated. The cells were incubated with a medium A containing 10% CCK-8 reagent for 1.5 h at 37°C in a CO<sub>2</sub> incubator. The reaction solution (100 µl each) was then transferred to a 96-well dish and was analyzed by measuring absorbance at OD<sub>485 nm</sub> using a CHAMELEON microplate reader (Hidex).

### **Western blot analysis**

Whole cells were extracted with sodium dodecyl sulfate (SDS) sample buffer and were boiled for 5 min at 95°C followed by protein quantification using the Bradford reagent. Total proteins were separated using 10% or 13.5% SDS polyacrylamide gel electrophoresis (SDS-PAGE) and transferred to an NC membrane. The blot was blocked for 1 h at room temperature in blocking buffer (3% skim milk, 0.1% Tween-20, phosphate buffered saline (PBS)) and then incubated with primary antibody at 4°C overnight. The blot was then washed with PBST (0.1% Tween-20, PBS) three times for 10 min and incubated with a horseradish peroxidase-conjugated secondary antibody in blocking buffer for 1.5 h. After being washed with PBST, the blot was analyzed with the SuperSignal ECL detection system.

### **Cell morphology analysis**

DU145 cells were split in a six-well dish (1 X 10<sup>5</sup> cells) or 10 cm dish (2.5 X 10<sup>6</sup> cells) and cultured with the indicated drug(s) for the indicated time. The cell morphology was analyzed

using phase-contrast light microscopy (EVOS XL Core, Life Technologies) with X 150 amplification.

### **Detection of dead cells**

DU145 cells were split in a six-well dish ( $1 \times 10^5$  cells) and treated as indicated. Without removing the medium, the cells were stained with a 0.04% trypan blue staining solution for 30 min. Dead cells changed to a dark blue color were visualized using bright-field phase-contrast light microscopy (EVOS XL Core, Life Technologies) with X 150 amplification. The color contrast of the images was adjusted with a Photoshop program.

### **Sample preparation, 2D electrophoresis, CBB staining and image analysis**

Whole cells (attached and floating cells) were washed with PBS and prepared for 2D electrophoresis as previously described (33). Protein samples (500  $\mu$ g each) were subjected to one-dimensional isoelectric focusing, followed by 2D electrophoresis on a 8.5-14% sucrose gradient polyacrylamide gel. The gels were fixed in fixing solution (40% methanol, 5% ortho-phosphoric acid) at room temperature for 3 h and were stained with CBB staining solution (17% ammonium sulfate, 3% phosphoric acid, 34% methanol, 0.1% CBB G) for 24 h. After destaining with H<sub>2</sub>O, gel images were obtained using a UMAX scanner (PowerLook 2100XL). A quantitative analysis of 8 CBB-stained images (DMSO- and simvastatin-treated 2 groups) was performed using PDQuest software (Bio-Rad) according to the manufacturer's instructions.

### **Mass spectrometric analysis and database search**

The CBB-stained protein spots were excised and finely chopped, and the gel pieces were destained, reduced, alkylated and in-gel tryptic digested as previously described (33). The

tryptic digested peptides were collected by extraction with 66% ACN/0.1% trifluoroacetic acid and were dried in a vacuum centrifuge. The peptides were resolved with 50% acetonitrile/0.1% trifluoroacetic acid solution, and 1.5  $\mu$ l of the sample was mixed with 1.5  $\mu$ l of matrix solution (10 mg of  $\alpha$ -cyano-4-hydroxycinnamic acid, 50% acetonitrile, 0.1% trifluoroacetic acid). The mixed tryptic peptides (1  $\mu$ l) were immediately spotted onto a 384-well target plate for mass spectrometric analysis. Peptide mass spectra were obtained using a ABI 4800 Plus TOF/TOF mass spectrometer (Applied Biosystems, Framingham, MA, USA) and were analyzed as previously described (34).

### **Statistical significance**

Statistical significance was determined using Student's *t*-test ( $P < 0.05$  was considered statistically significant).

### **REFERENCES**

33. Jung EJ, Lee SY, Kim CW (2013) Proteomic analysis of novel targets associated with TrkA-mediated tyrosine phosphorylation signaling pathways in SK-N-MC neuroblastoma cells. *Proteomics* 13, 355–367
34. Jung EJ, Chung KH, Bae DW, Kim CW (2016) Proteomic analysis of novel targets associated with the enhancement of TrkA-induced SK-N-MC cancer cell death caused by NGF. *Exp Mol Med* 48, e235
